# Supplementary material
Source: MDPI journal article supplement (https://www.mdpi.com/2073-4441/14/8/1192)
Supplement: s1 [file s1]

Table S1: Recapitulation of yearly highest discharge values both for simulated WRF-H and station dataset, followed by KGE during the rainy season.

|      |                      | Catchment              |                        |
|------|----------------------|------------------------|------------------------|
|      |                      | Savè                   | Bétérou                |
| 2008 | High value observed  | 1250 m <sup>3</sup> /s | 500 m <sup>3</sup> /s  |
|      | High value simulated | 1935 m <sup>3</sup> /s | 1320 m <sup>3</sup> /s |
|      | KGE                  | 0.22                   | 0.16                   |
| 2009 | High value observed  | 1127 m <sup>3</sup> /s | 572 m <sup>3</sup> /s  |
|      | High value simulated | 1453 m <sup>3</sup> /s | 854 m <sup>3</sup> /s  |
|      | KGE                  | 0.62                   | 0.69                   |
| 2010 | High value observed  | 2200 m <sup>3</sup> /s | 930 m <sup>3</sup> /s  |
|      | High value simulated | 2090 m <sup>3</sup> /s | 950 m <sup>3</sup> /s  |
|      | KGE                  | 0.80                   | 0.84                   |

Table S2 : Comparison of KGE between the deterministic model WRF-H, and WRF-Hydro-SKEBS for Savè (resp. Bétérou).

|                 | 2008                           | 2009                           | 2010                           |
|-----------------|--------------------------------|--------------------------------|--------------------------------|
| WRF-H           | 0.22<br>(resp. 0.18)           | 0.62<br>(resp. 0.69)           | 0.80<br>(resp. 0.73)           |
| WRF-Hydro-SKEBS | 0.10-0.41<br>(resp. 0.12-0.46) | 0.30-0.64<br>(resp. 0.42-0.75) | 0.14-0.79<br>(resp. 0.14-0.70) |

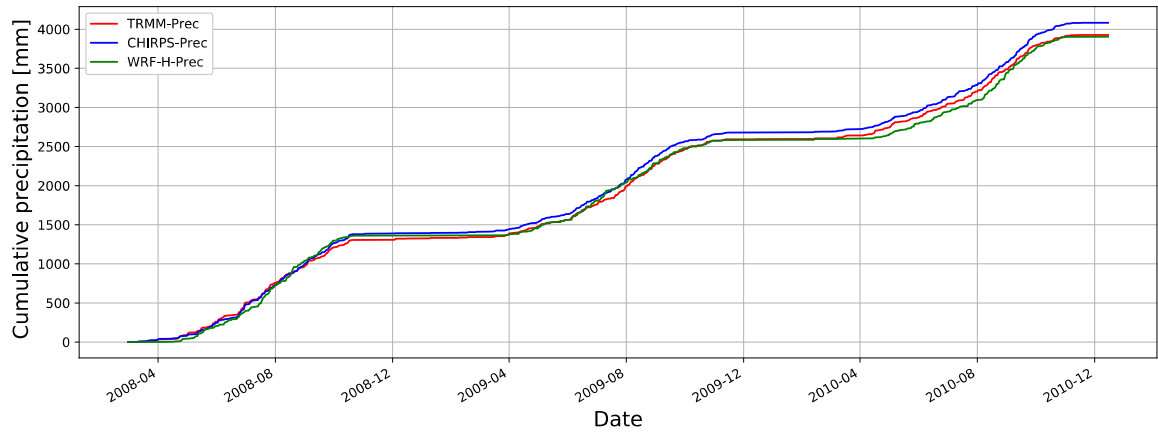

Figure S1: cumulative total precipitation derived from TRMM, CHIRPS and simulated in WRF-H over Savè during the period 2008 to 2010.

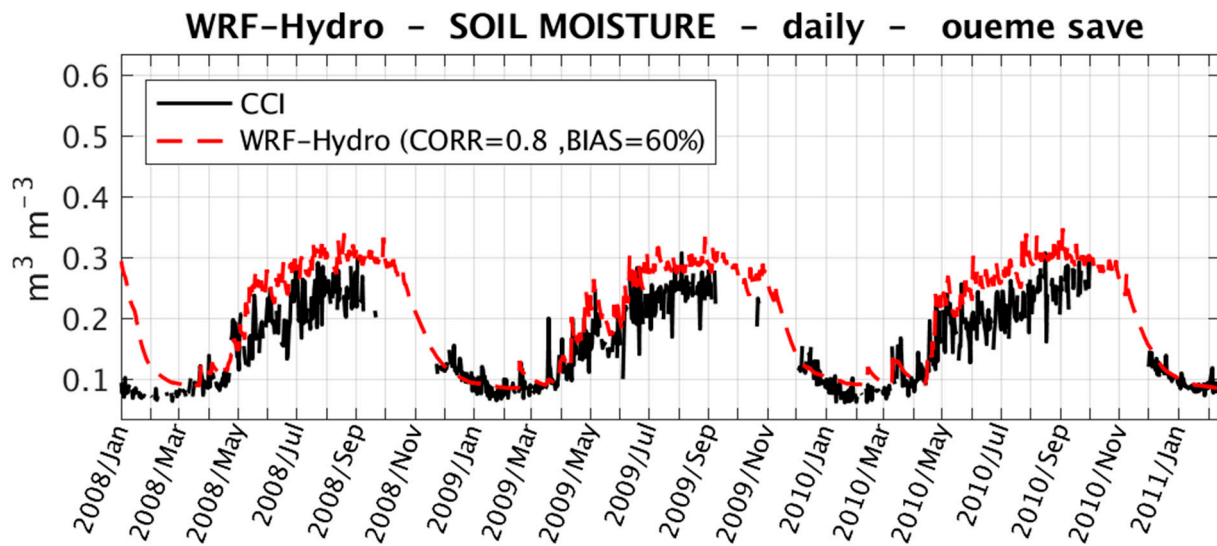

Figure S2: Evaluation of the soil moisture between the simulated with WRF-H of the first Noah LSM soil layer (from 0 to 10 cm) and the daily average from CCI (from 0.5 to 2 cm) over Savè catchment.

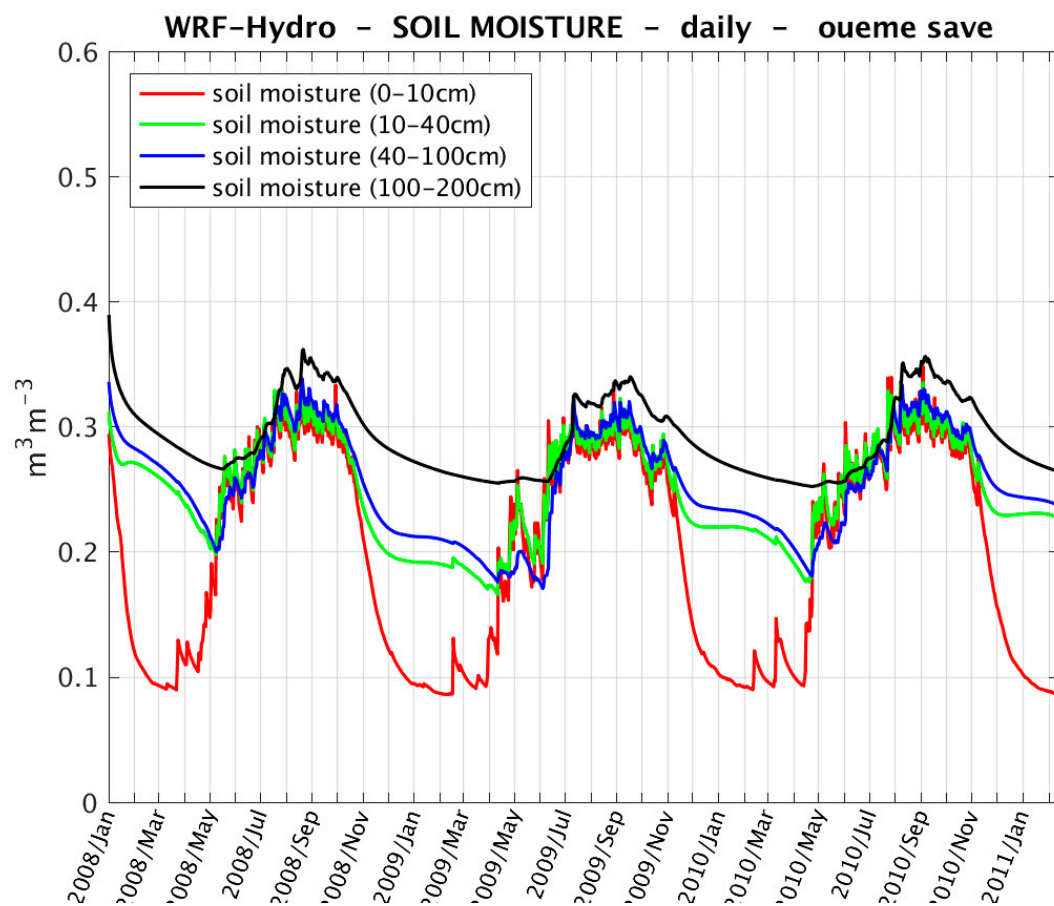

Figure S3: Daily average time series of soil water content (SWC) of the four Noah LSM soil layers of the WRF-H simulation at Savè.
